# Supplementary material for: A Conserved CXXC Motif in CD3ε Is Critical for T Cell Development and TCR Signaling
Source: PLOS journal article supplement (doi:10.1371/journal.pbio.1000253), 2009-11-30

**A.**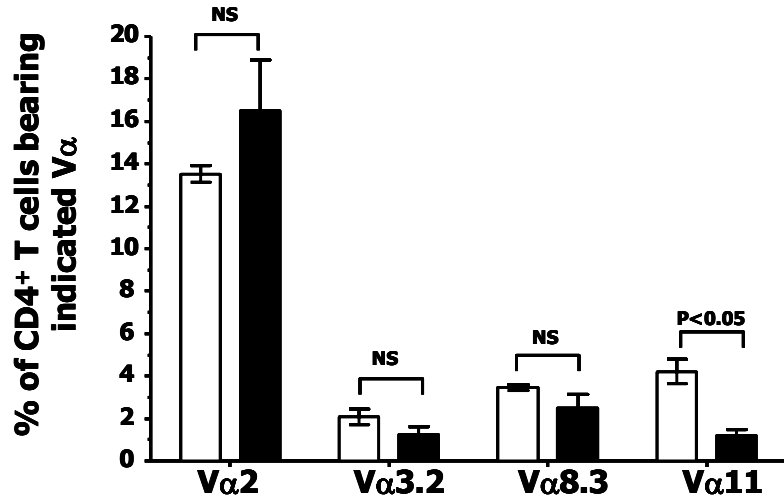**B.**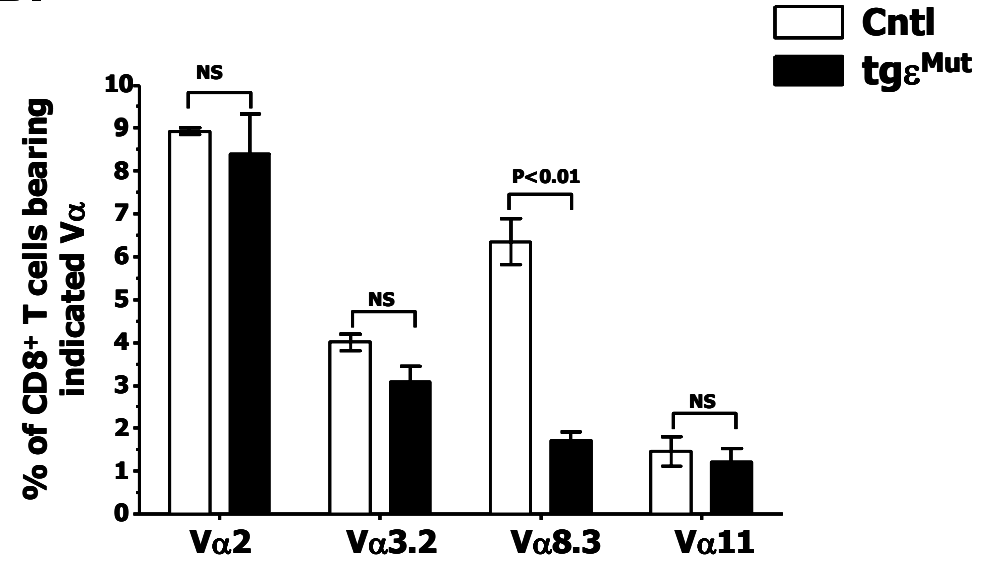**C.**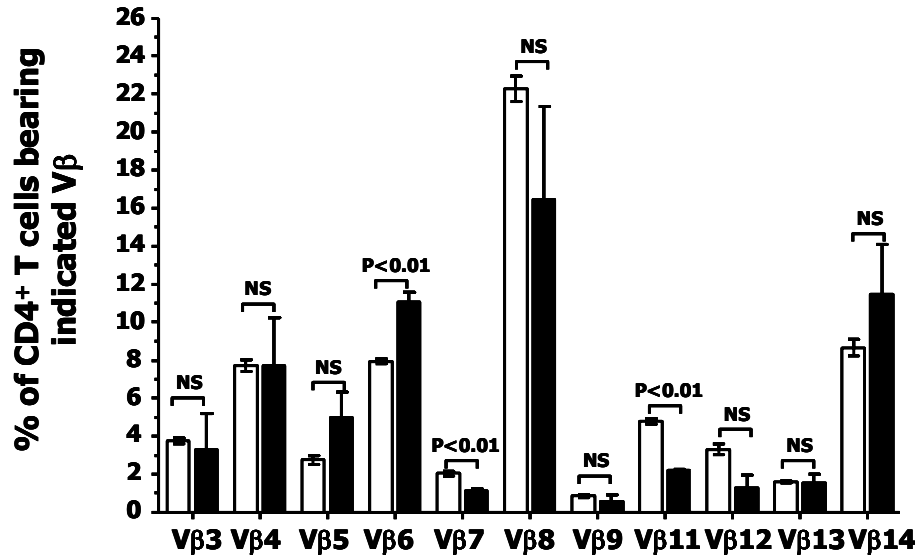**D.**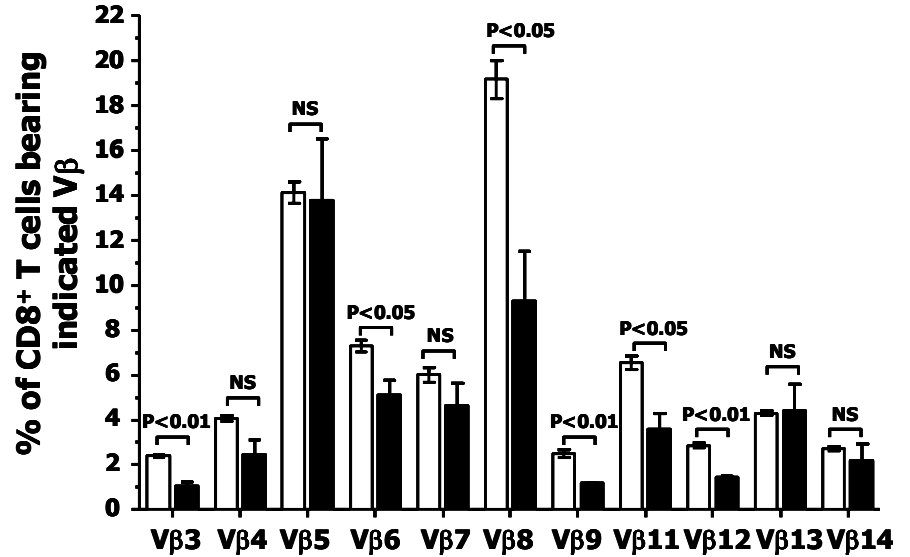

Supplement: S1 (10.1371/journal.pbio.1000253.s001) [file journal.pbio.1000253.s001]
